# Supplementary material for: Improving areal capacity of flexible Li–CO2 batteries by constructing a freestanding cathode with monodispersed MnO nanoparticles in N-doped mesoporous carbon nanofibers
Source: Royal Society of Chemistry journal article supplement (doi:10.1039/d0ta02387f), 2020-01-01
Supplement: d0ta02387f1.pdf [file d0ta02387f1.pdf]

Supporting Information for  
**Improving areal capacity of flexible Li–CO<sub>2</sub> batteries by  
constructing freestanding cathode with monodispersed MnO  
nanoparticles in N-doped mesoporous carbon nanofibers**

Siwu Li, Yuan Liu, Xing Gao, Jiaming Wang, Junwen Zhou, Lu Wang,\* and Bo Wang\*

Beijing Key Laboratory of Photoelectronic/Electrophotonic Conversion Materials, Key  
Laboratory of Cluster Science, Ministry of Education, School of Chemistry and Chemical  
Engineering, Beijing Institute of Technology Beijing 100081, P. R. China

E-mail: bowang@bit.edu.cn, luwang@bit.edu.cn

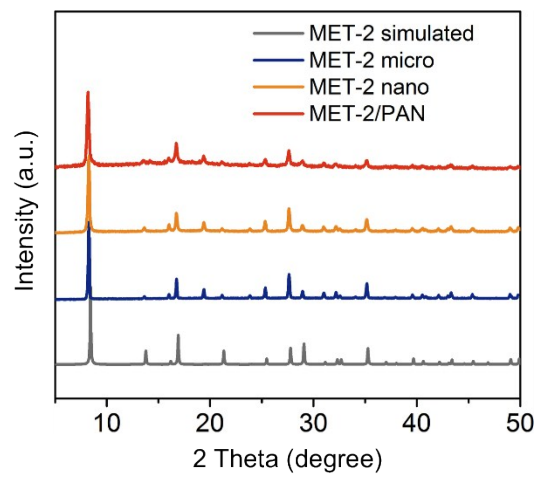

**Fig. S1** PXRD patterns of different types of MET-2 particles and their PAN composite.

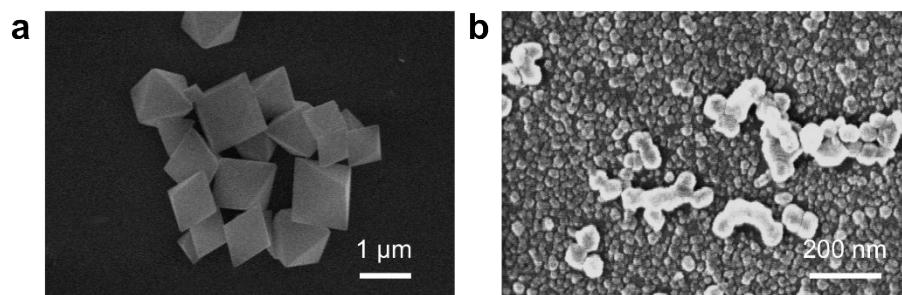

**Fig. S2** SEM images of (a) micro-sized MET-2 and (b) nano-sized MET-2 particles.

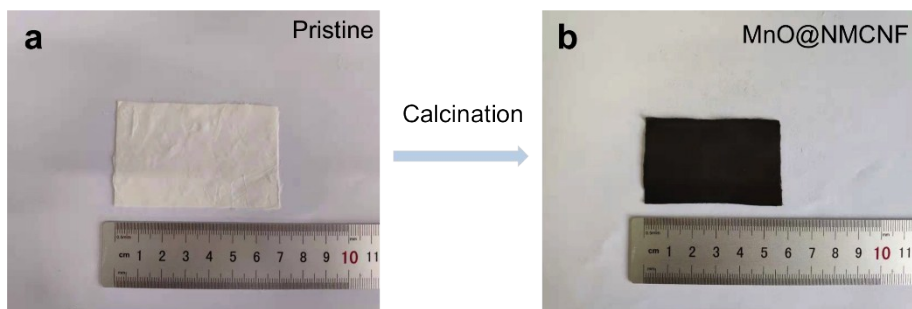

**Fig. S3** Photos of (a) pristine MET-2/PAN film and (b) its corresponding product after calcination at 800 °C.

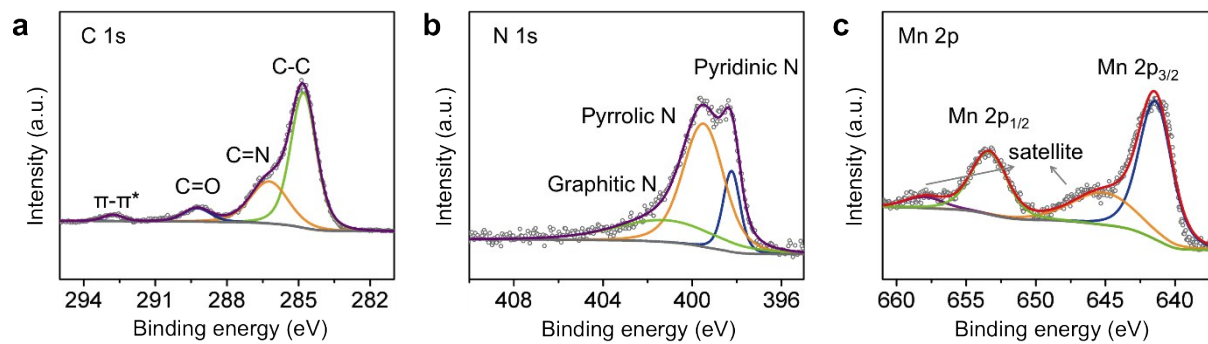

**Fig. S4** XPS spectra of (a) C 1s, (b) N 1s and (c) Mn 2p for MnO@NMCNF.

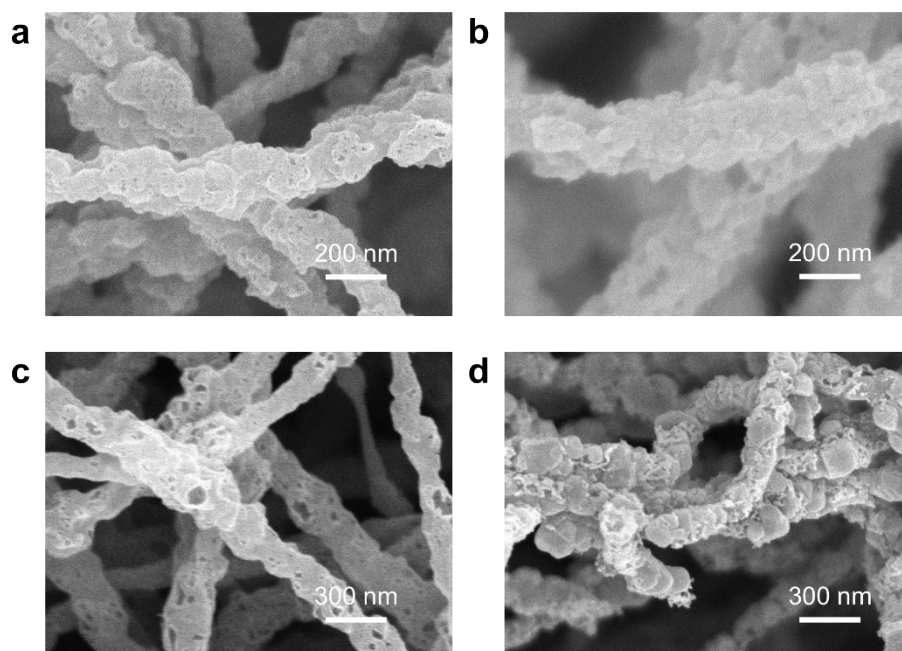

**Fig. S5** SEM images of (a) MnO@NMCNF-600, (b) MnO@NMCNF-700, (c) MnO@NMCNF and (d) MnO@NMCNF-900.

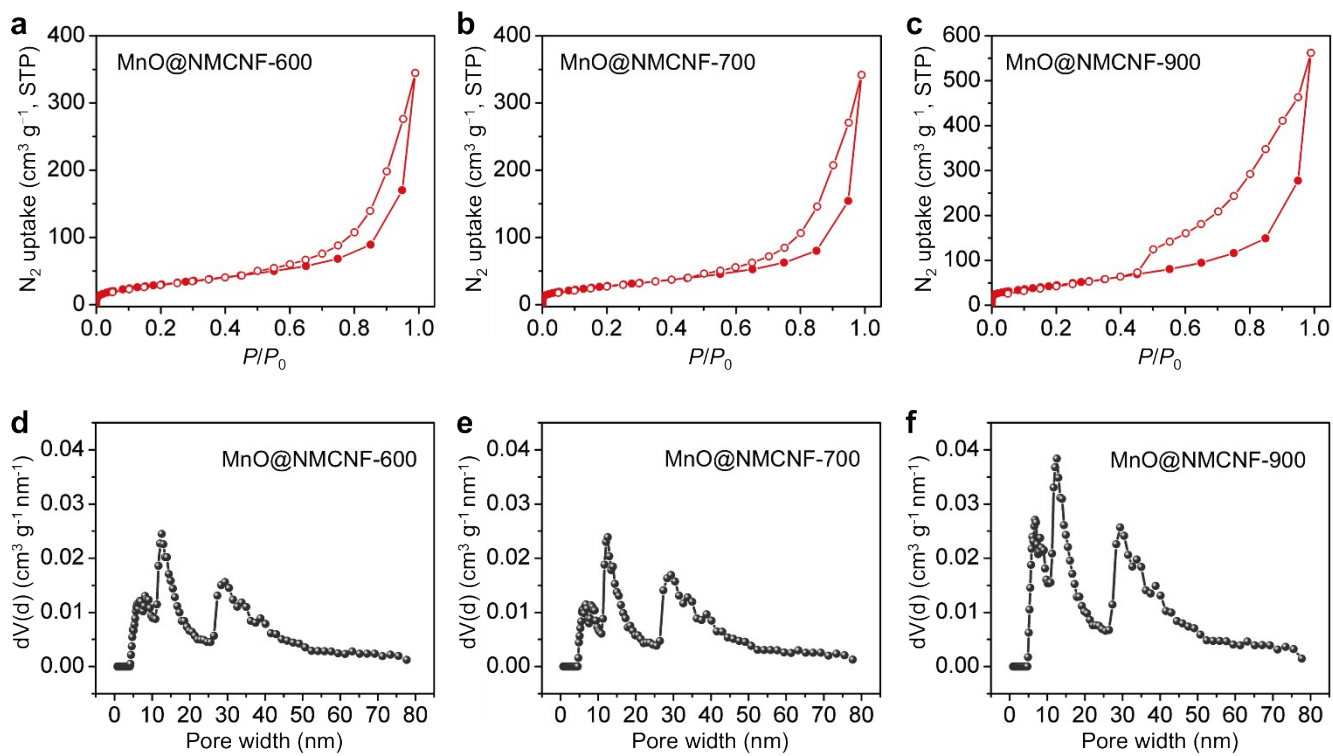

**Fig. S6**  $N_2$ -77 K adsorption isotherms of (a) MnO@NMCNF-600, (b) MnO@NMCNF-700 and (c) MnO@NMCNF-900 and (d-f) corresponding pore distribution.

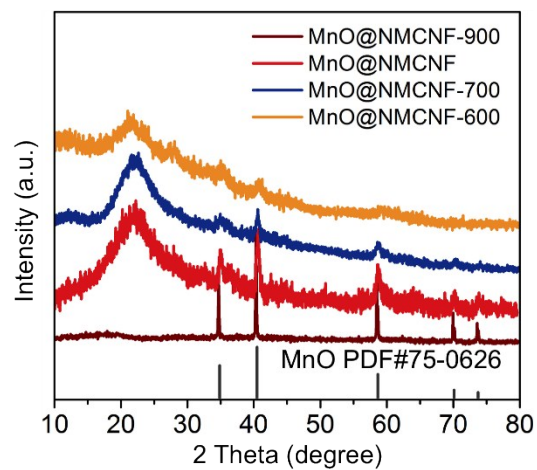

**Fig. S7** XRD patterns of MET-2/PAN (with MOF ratio of 60 wt%) fibers calcined at different temperatures.



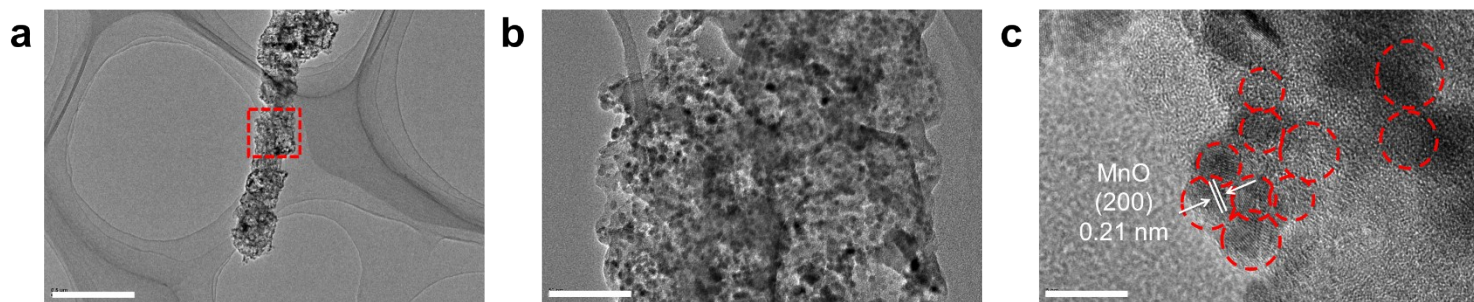

**Fig. S8** (a, b) TEM and (c) HRTEM images of MnO@NMCNF-600. Scale bar: 500 nm in (a), 50 nm in (b), 5 nm in (c).

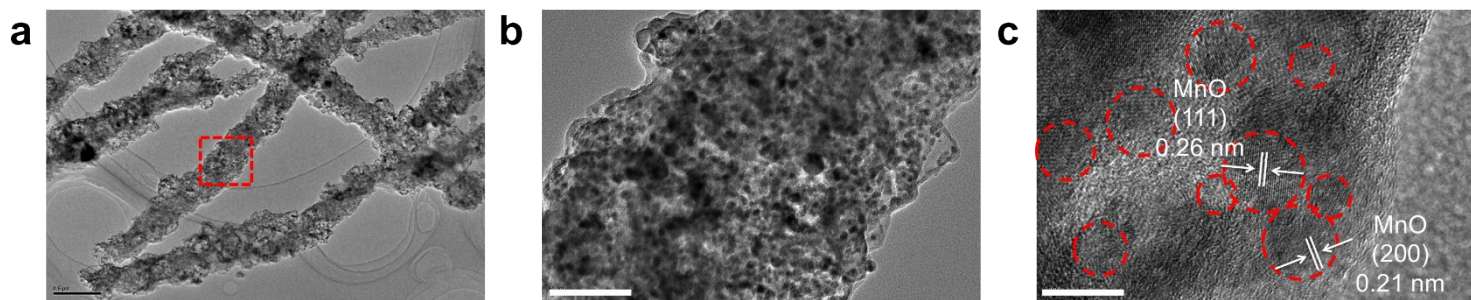

**Fig. S9** (a, b) TEM and (c) HRTEM images of MnO@NMCNF-700. Scale bar: 500 nm in (a), 50 nm in (b), 5 nm in (c).

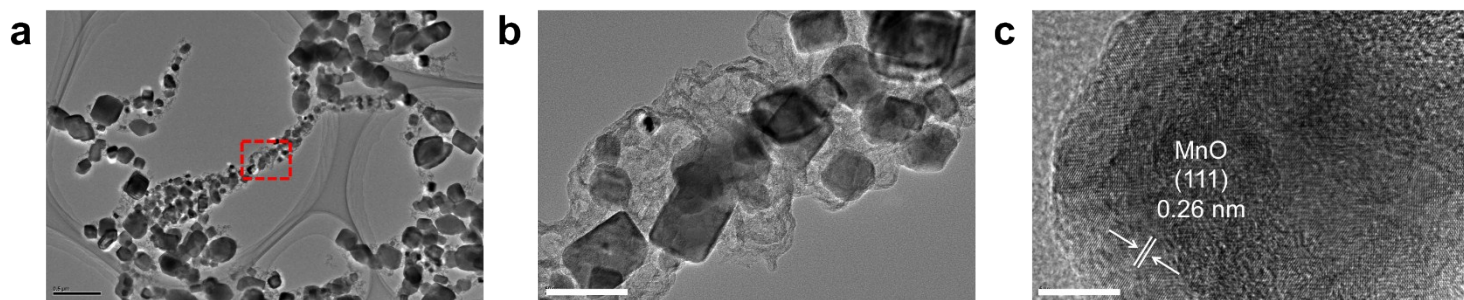

**Fig. S10** (a, b) TEM and (c) HRTEM images of MnO@NMCNF-900. Scale bar: 500 nm in (a), 50 nm in (b), 5 nm in (c).

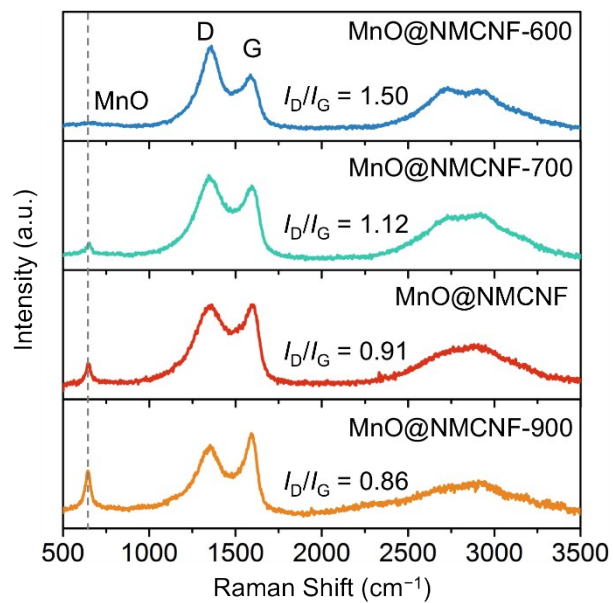

**Fig. S11** Raman spectra of MnO@NMCNF-600, MnO@NMCNF-700, MnO@NMCNF and MnO@NMCNF-900.

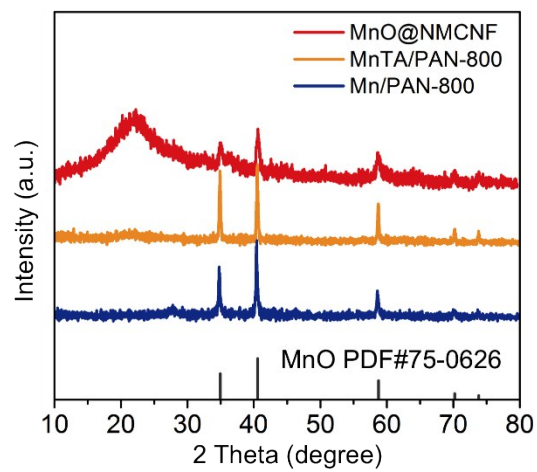

**Fig. S12** XRD patterns of different Mn-based fibers calcined at 800 °C.

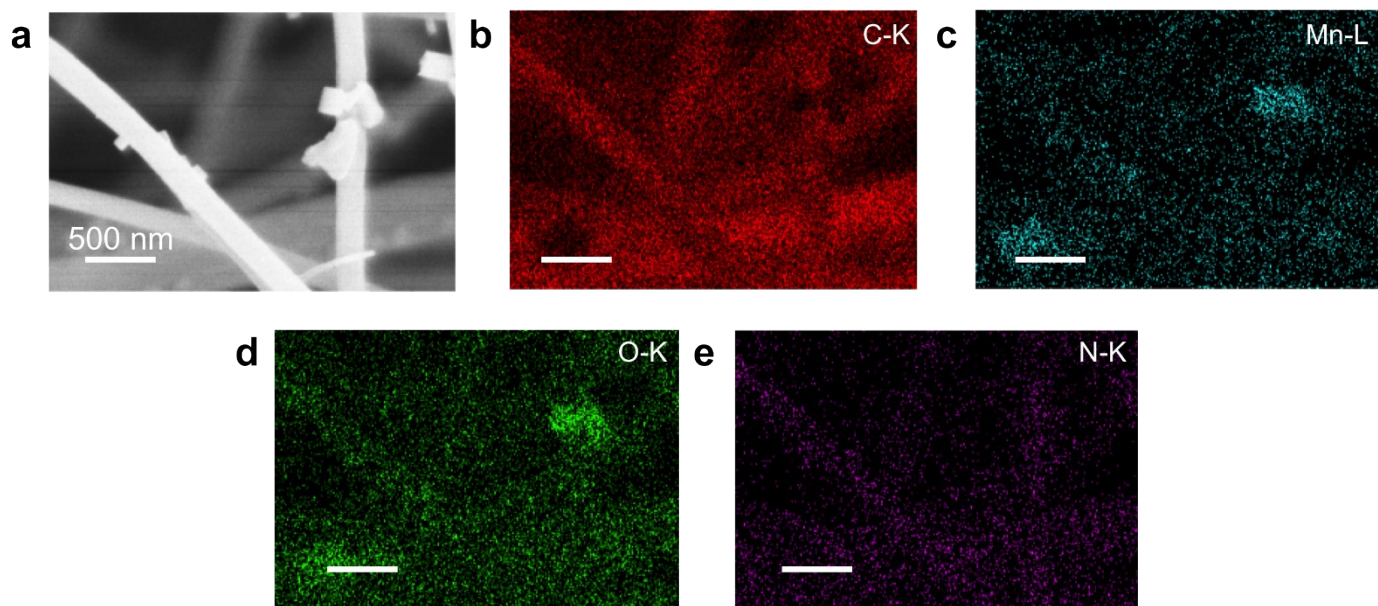

**Fig. S13** (a) SEM image of Mn/PAN-800 and (b–e) corresponding elemental mappings of C, Mn, O and N. Scale bar: 500 nm in (b–e).

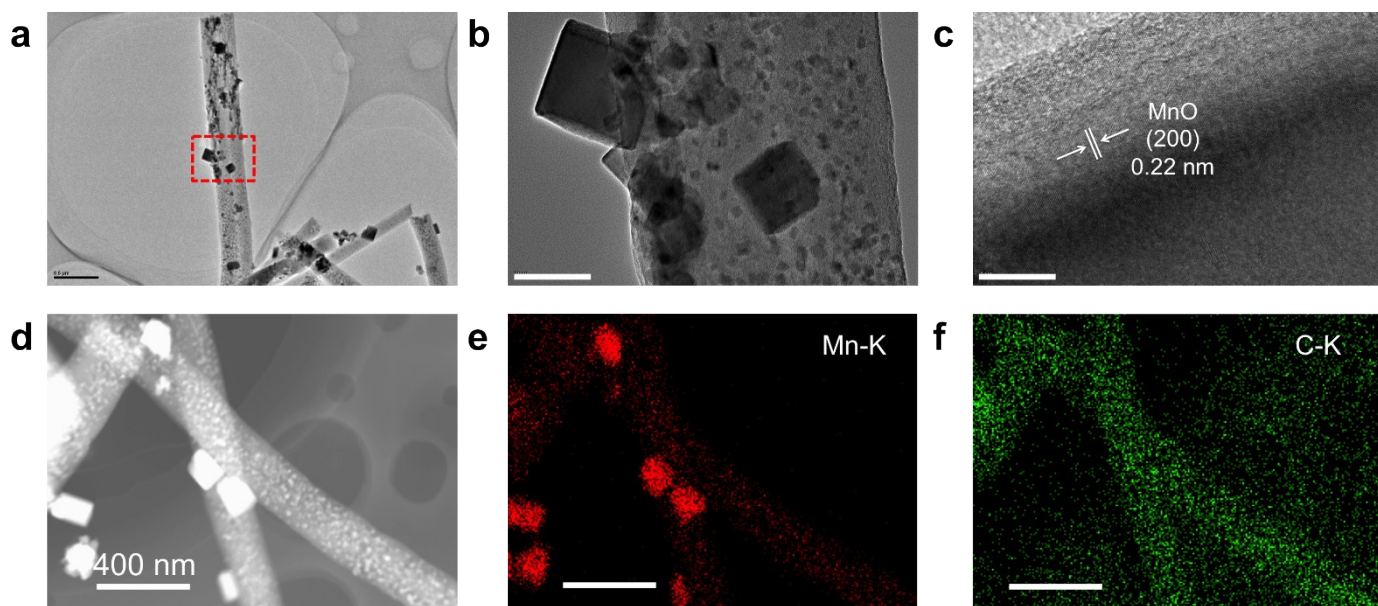

**Fig. S14** (a, b) TEM and (c) HRTEM images of Mn/PAN-800. (d-f) STM image of Mn/PAN-800 and corresponding elemental mappings of Mn and C. Scale bar: 500 nm in (a), 50 nm in (b), 5 nm in (c), 400 nm in (e) and (f).

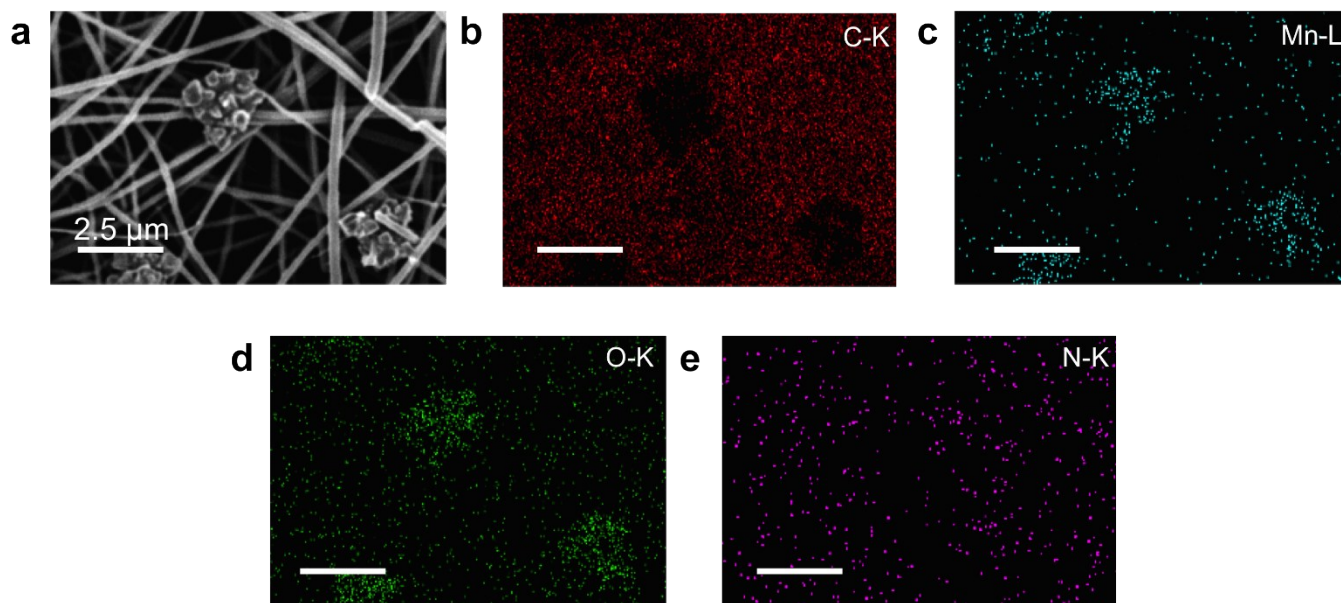

**Fig. S15** (a) SEM image of MnTA/PAN-800 and (b–e) corresponding elemental mappings of C, Mn, O and N. Scale bar: 2.5 μm in (b–e).



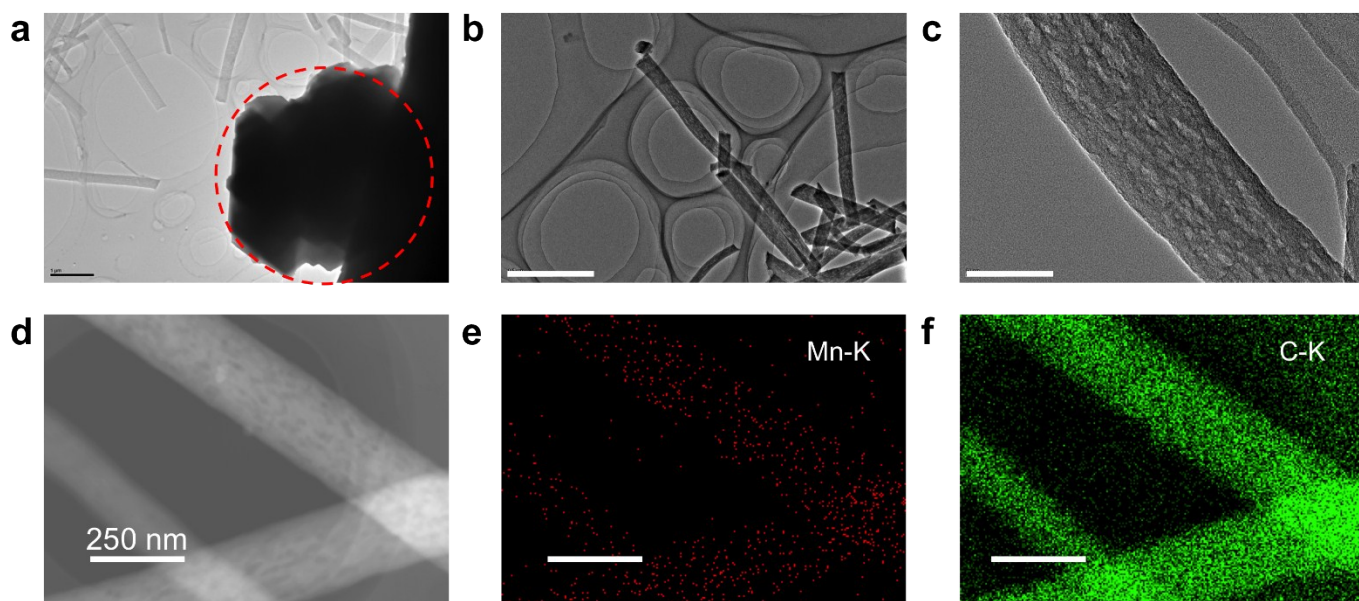

**Fig. S16** (a, b) TEM and (c) HRTEM images of MnTA/PAN-800. (d–f) STM image of MnTA/PAN-800 and corresponding elemental mappings of Mn and C. Scale bar: 500 nm in (a), 50 nm in (b), 5 nm in (c), 250 nm in (e) and (f).

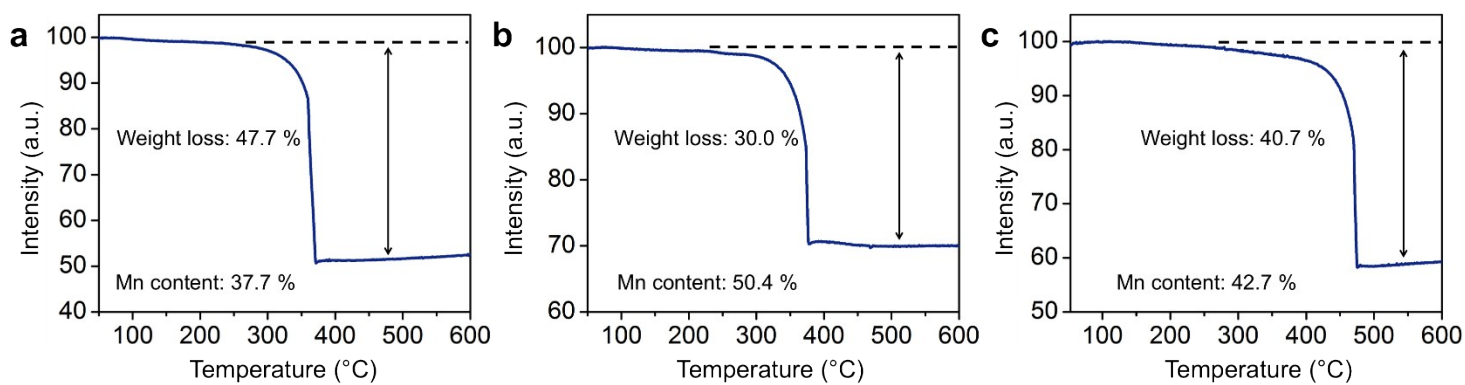

**Fig. S17** TG curves of (a) MnO@NMCNF, (b) Mn/PAN-800 and (c) MnTA/PAN-800 tested under air atmosphere with a heating rate of  $10\text{ }^{\circ}\text{C min}^{-1}$ .

The weight ratio of Mn was calculated according to the PXRD result (Fig. S18) of their corresponding product after TG test.

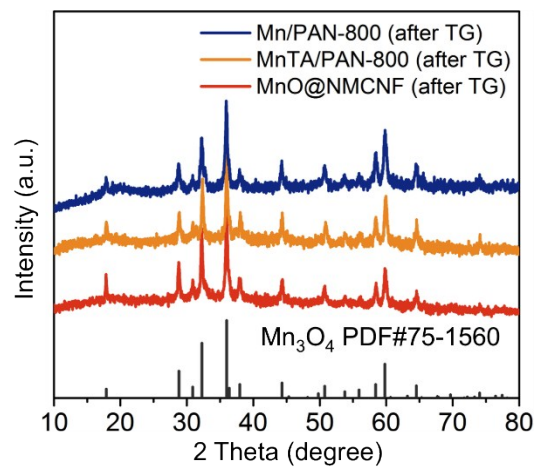

**Fig. S18** PXRD patterns of the samples after TG test.

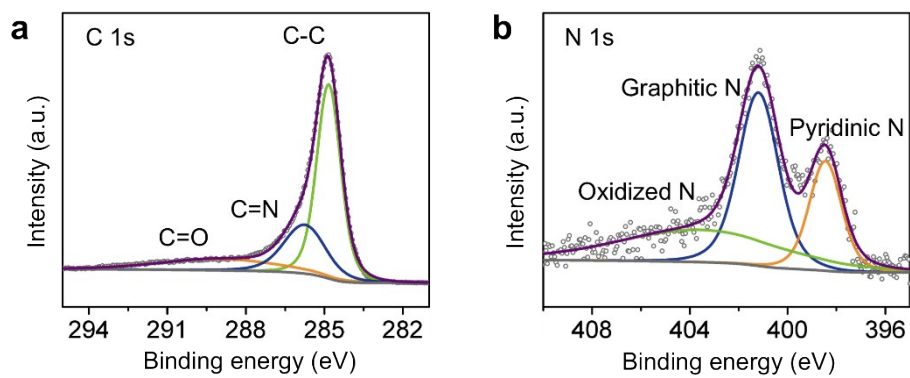

**Fig. S19** XPS spectra of (a) C 1s and (b) N 1s for PAN-800.

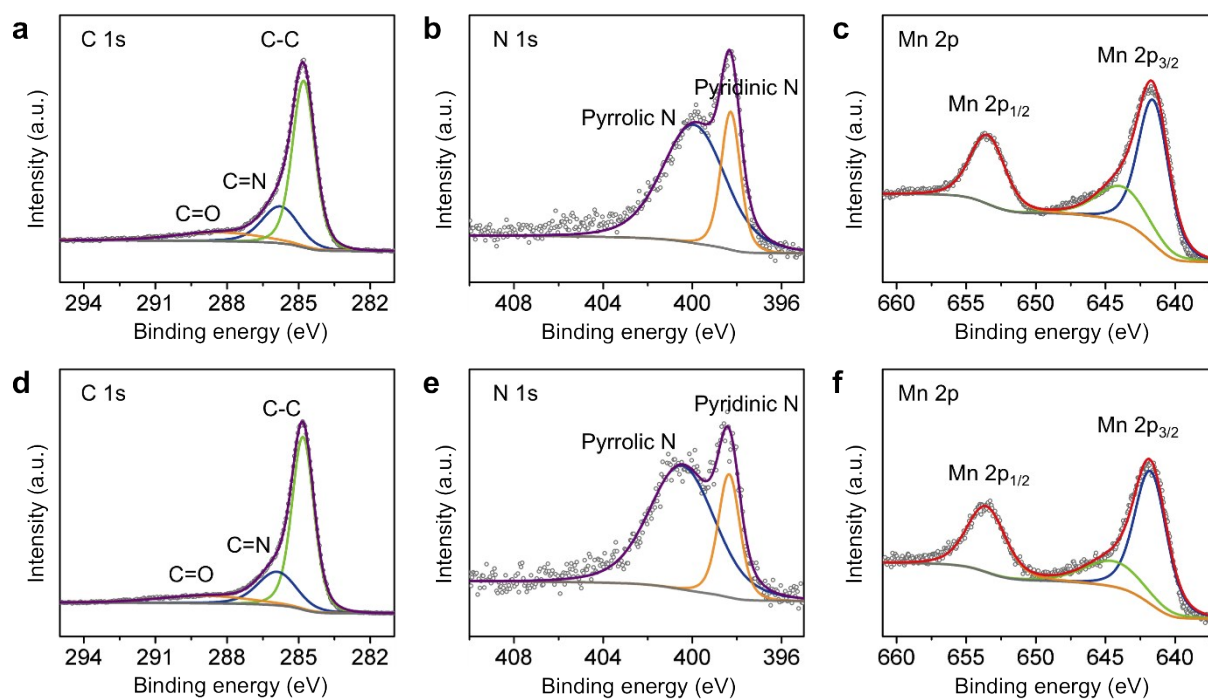

**Fig. S20** XPS analysis of (a–c) Mn/PAN-800 and (d–f) MnTA/PAN-800.

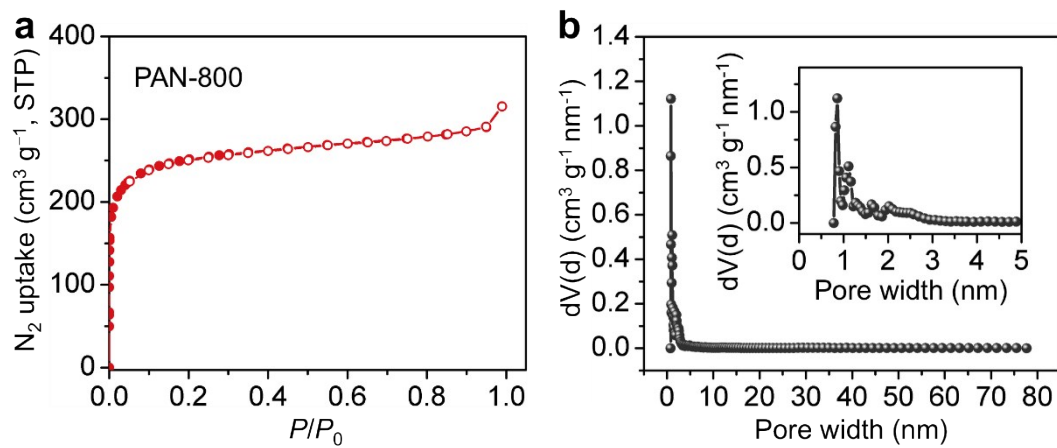

**Fig. S21** (a)  $N_2$ -77 K adsorption isotherms of PAN-800. (b) Pore distribution of PAN-800 (inset shows a magnified plot with pore width within 0–5 nm).

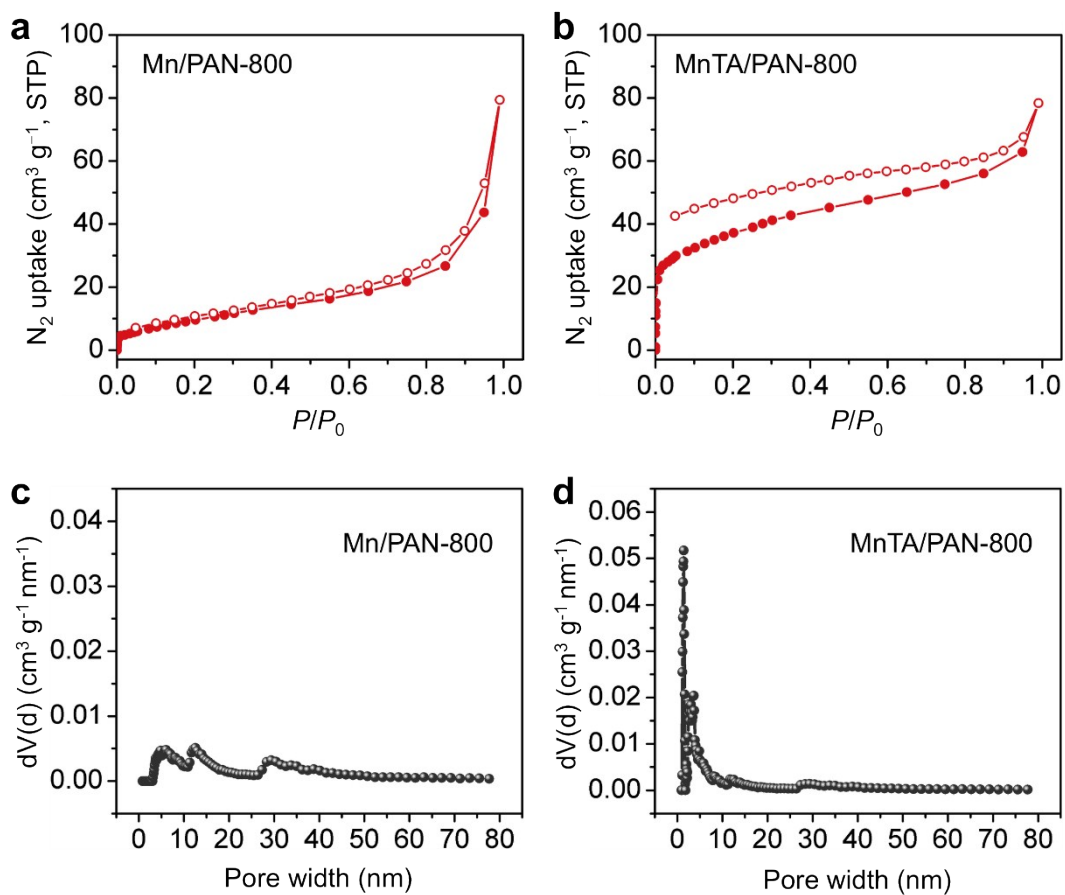

**Fig. S22**  $N_2$ -77 K adsorption isotherms of (a) Mn/PAN-800 and (b) MnTA/PAN-800 and (c, d) corresponding pore distribution.

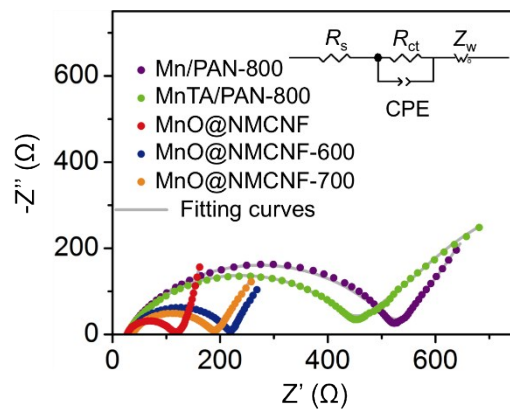

**Fig. S23** Nyquist plots of Li-CO<sub>2</sub> cells with different Mn-based electrode materials before cycling (the inset is the equivalent circuit model for fitting the Nyquist plots).



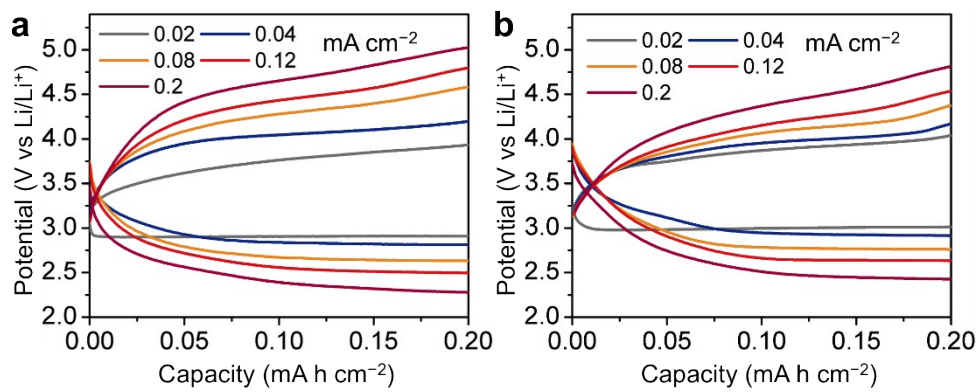

**Fig. S24** Discharge-charge voltage curves of (a) MnO@NMCNF-600 and (b) MnO@NMCNF-700 at different current densities with a cut-off capacity of  $0.20 \text{ mA h cm}^{-2}$ .

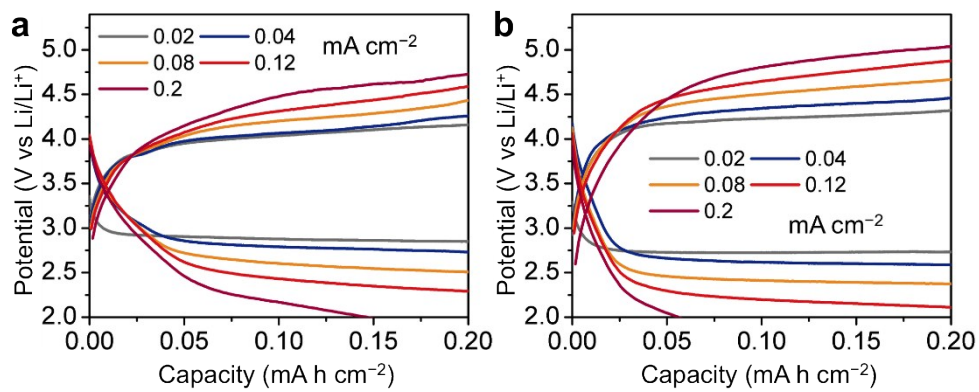

**Fig. S25** Discharge-charge voltage curves of (a) Mn/PAN-800 and (b) MnTA/PAN-800 at different current densities with a cut-off capacity of 0.20 mA h cm<sup>-2</sup>.

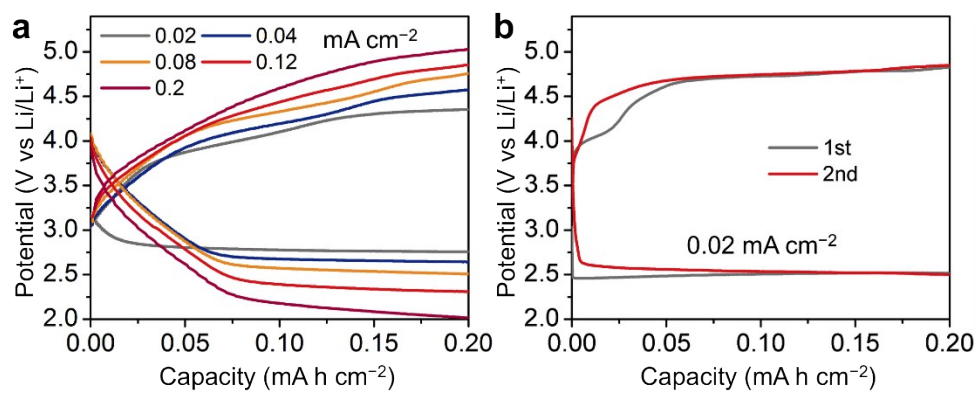

**Fig. S26** Discharge-charge voltage curves of (a) PAN-800 and (b) carbon cloth at different current densities with a cut-off capacity of 0.20 mA h cm<sup>-2</sup>.

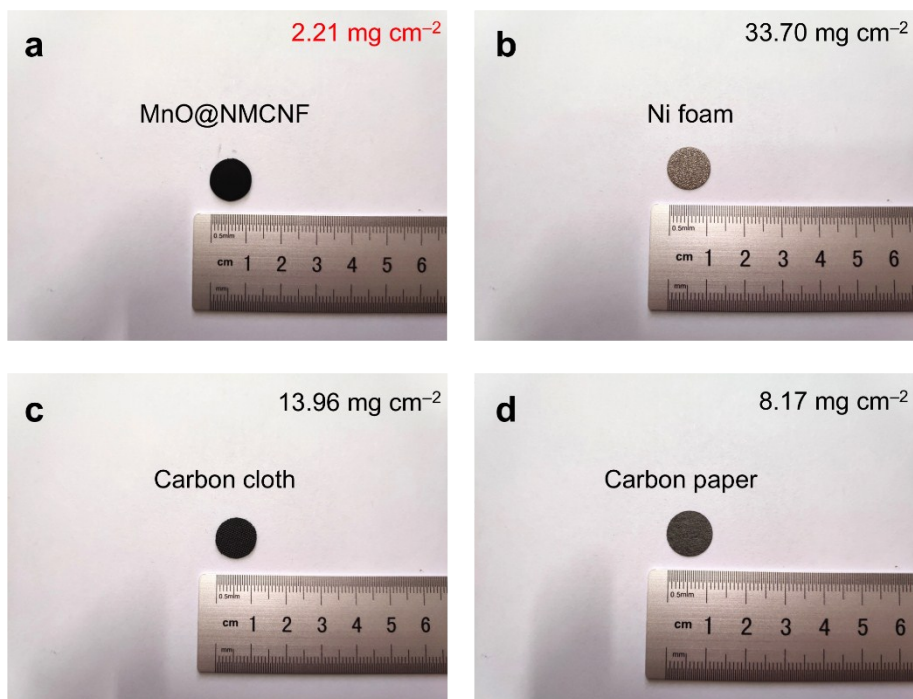

**Fig. S27** Photos of different electrodes with diameter of 12 mm and their corresponding areal mass: (a) MnO@NMCNF, (b) Ni foam, (c) carbon cloth and (d) carbon paper.

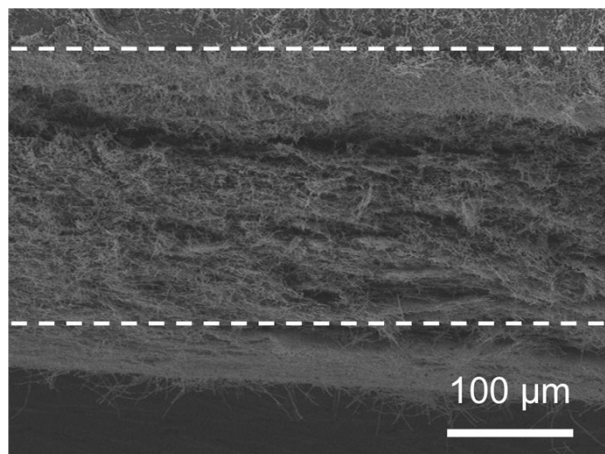

**Fig. S28** SEM image of the cross-section of MnO@NMCNF.

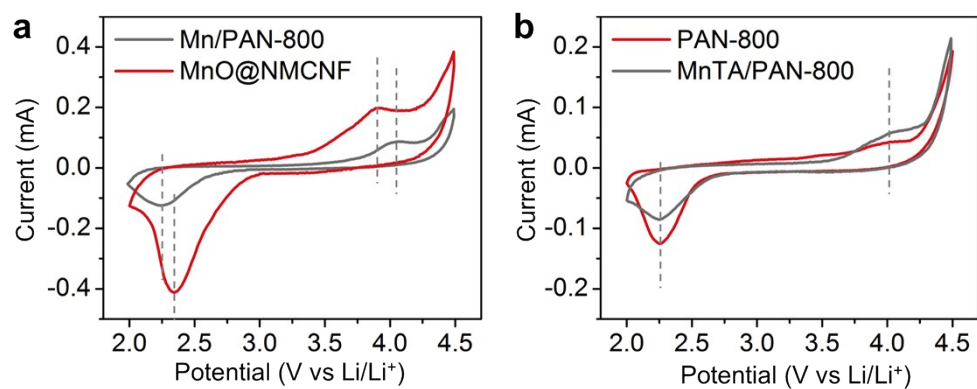

**Fig. S29** Cyclic voltammetry curves of different Li-CO<sub>2</sub> cells at a scan rate of 0.1 mV s<sup>-1</sup> with a voltage range of 2.0–4.5 V. (a) MnO@NMCNF and Mn/PAN-800. (b) PAN-800 and MnTA/PAN-800.

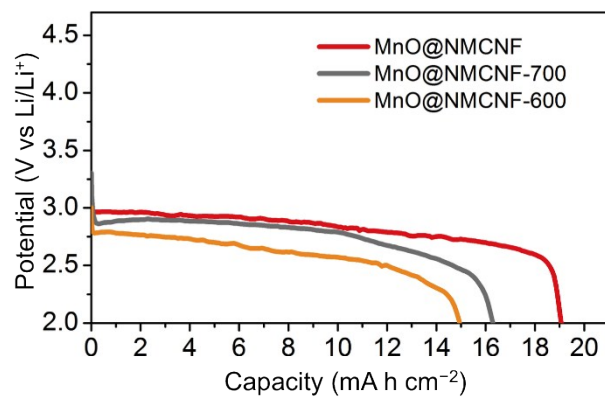

**Fig. S30** Discharge profiles of MnO@NMCNF-600, MnO@NMCNF-700 and MnO@NMCNF cathodes at 0.04 mA cm<sup>-2</sup> with a cut-off voltage of 2.0 V.

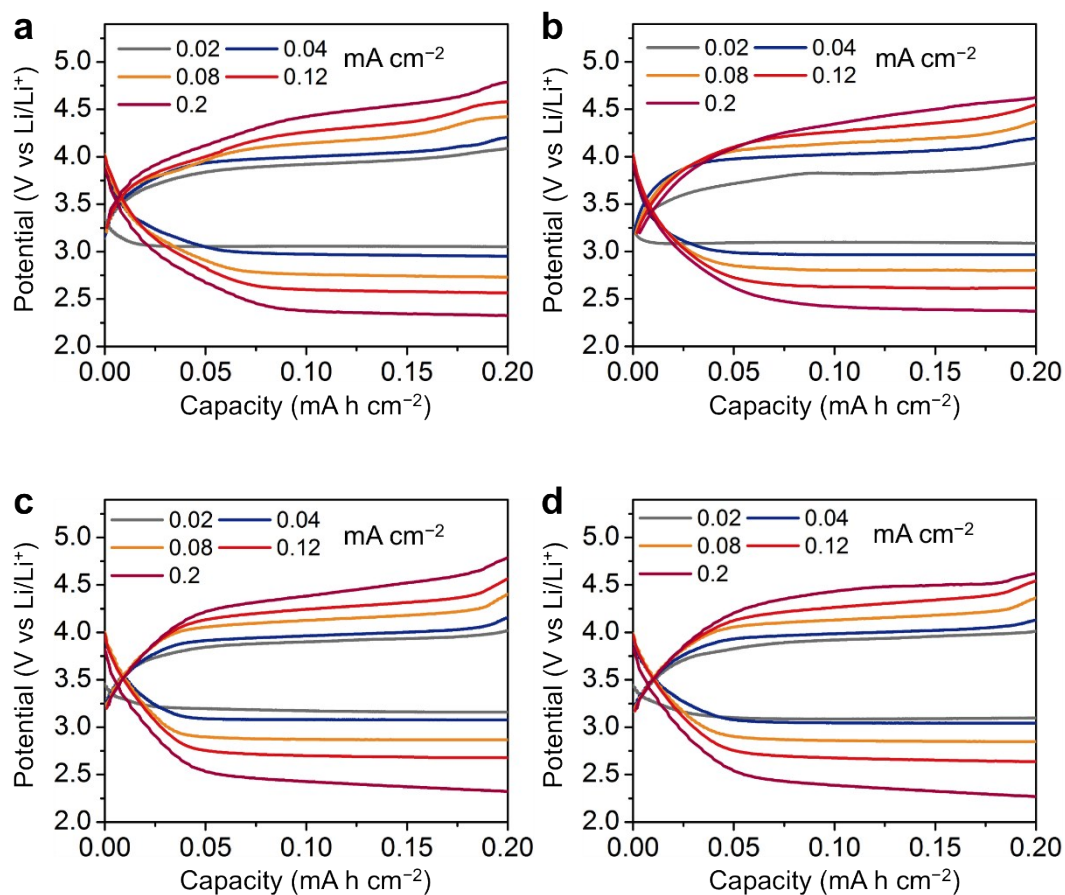

**Fig. S31** Discharge-charge voltage curves of (a) MnO@NMCNF-R50, (b) MnO@NMCNF, (c) MnO@NMCNF-R70 and (d) MnO@NMCNF-R80 at different current densities with a cut-off capacity of 0.2 mA h cm<sup>-2</sup>.



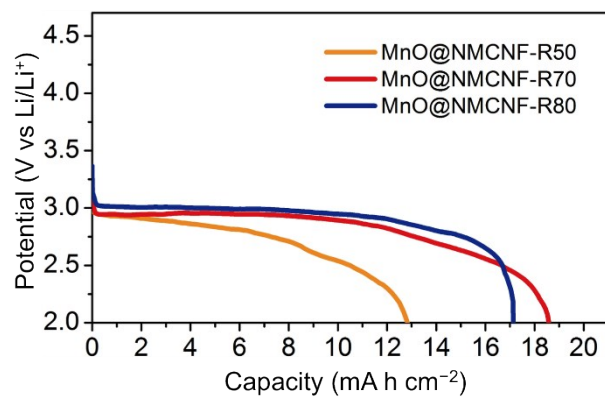

**Fig. S32** Discharge profiles of MnO@NMCNF-R50, MnO@NMCNF-R70 and MnO@NMCNF-R80 cathodes at 0.04 mA cm<sup>-2</sup> with a cut-off voltage of 2.0 V.

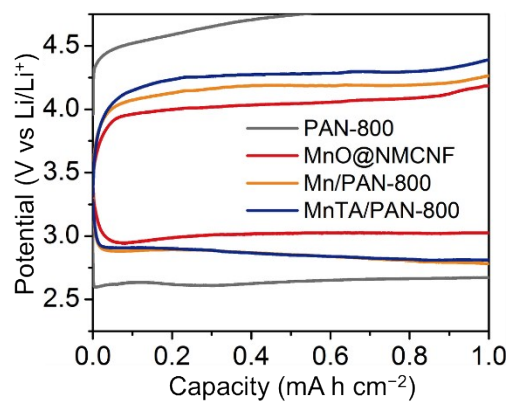

**Fig. S33** Discharge-charge voltage curves of MnO@NMCNF, Mn/PAN-800, MnTA/PAN-800 and PAN-800 at 0.04 mA cm<sup>-2</sup> with a cut-off capacity of 1 mA h cm<sup>-2</sup>.

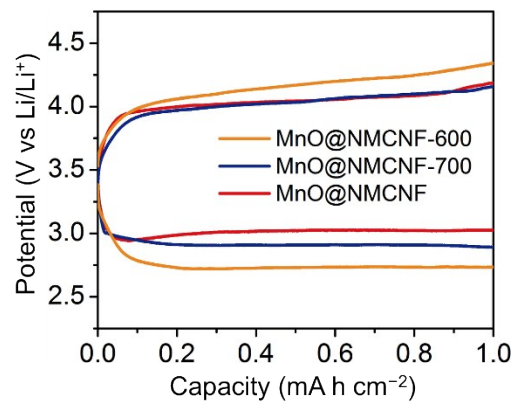

**Fig. S34** Discharge-charge voltage curves of MnO@NMCNF-600, MnO@NMCNF-700 and MnO@NMCNF at 0.04 mA cm<sup>-2</sup> with a cut-off capacity of 1 mA h cm<sup>-2</sup>.

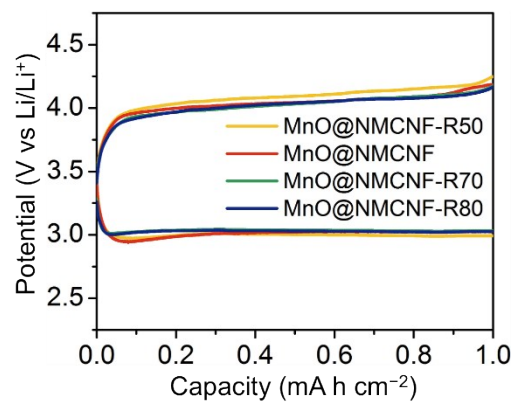

**Fig. S35** Discharge-charge voltage curves of MnO@NMCNF-R50, MnO@NMCNF, MnO@NMCNF-R70 and MnO@NMCNF-R80 at 0.04 mA cm<sup>-2</sup> with a cut-off capacity of 1 mA h cm<sup>-2</sup>.

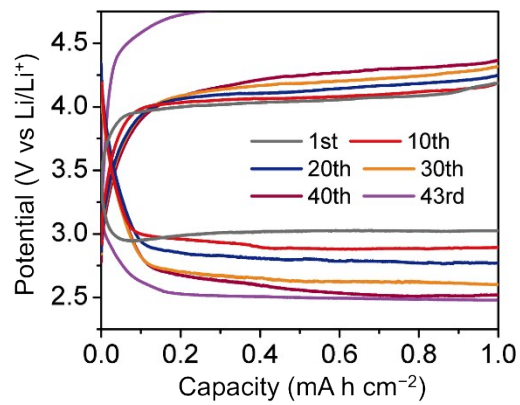

**Fig. S36** Cycling performance of MnO@NMCNF at 0.04 mA cm<sup>-2</sup> with a cut-off capacity of 1 mA h cm<sup>-2</sup>.

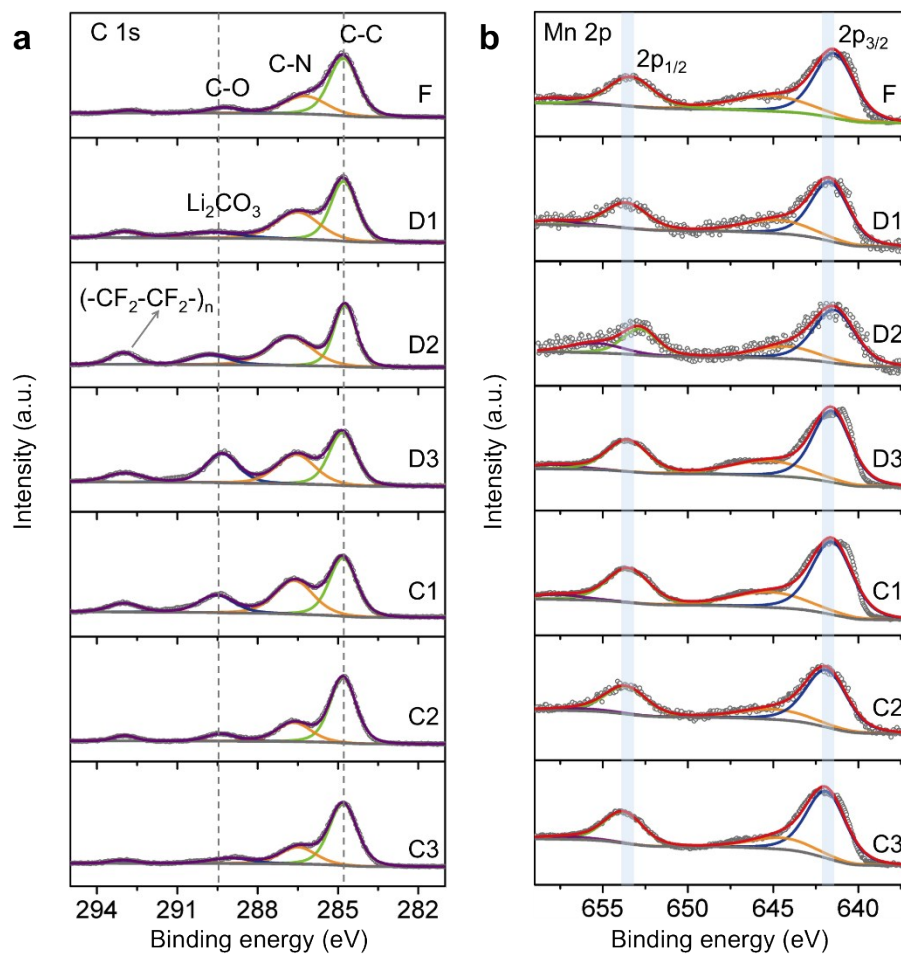

**Fig. S37** XPS analysis of MnO@NMCNF electrodes at different states during operation at 0.04 mA cm<sup>-2</sup> (F: fresh electrode; D1–D3: discharge to 0.2, 0.5 and 1 mA h cm<sup>-2</sup>, respectively; C1–C3: recharged to 0.2, 0.5 and 1 mA h cm<sup>-2</sup>, respectively): (a) C 1s and (b) Mn 2p spectra.

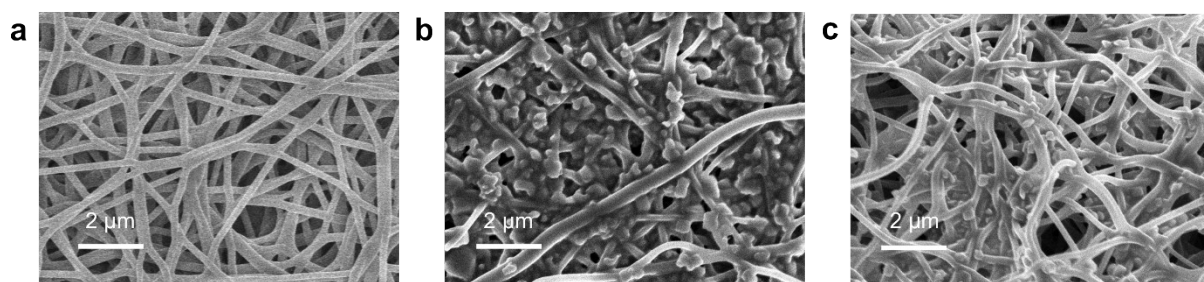

**Fig. S38** SEM images of (a) a fresh, (b) a discharged and (c) a recharged PAN-800 cathode tested under  $0.04 \text{ mA cm}^{-2}$  with a cut-off capacity of  $1.0 \text{ mA h cm}^{-2}$ .

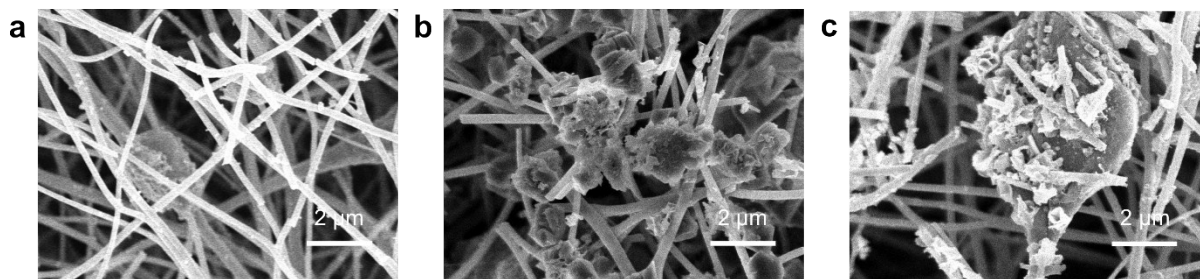

**Fig. S39** SEM images of (a) a fresh, (b) a discharged and (c) a recharged Mn/PAN-800 cathode tested under  $0.04 \text{ mA cm}^{-2}$  with a cut-off capacity of  $1.0 \text{ mA h cm}^{-2}$ .



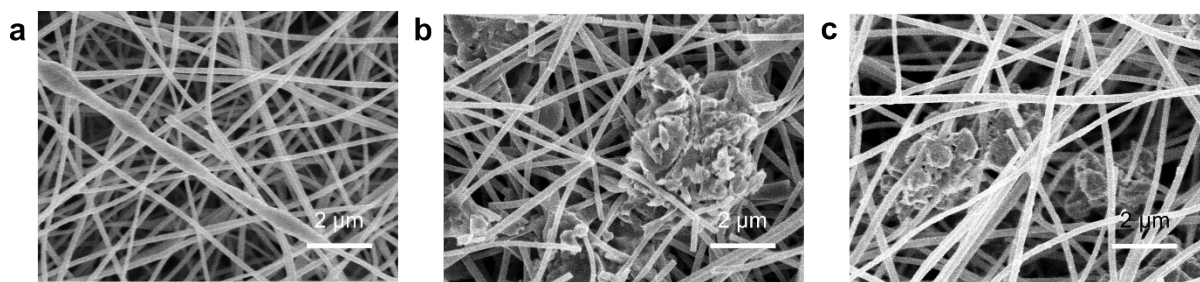

**Fig. S40** SEM images of (a) a fresh, (b) a discharged and (c) a recharged MnTA/PAN-800 cathode tested under  $0.04 \text{ mA cm}^{-2}$  with a cut-off capacity of  $1.0 \text{ mA h cm}^{-2}$ .

**Table S1.** Surface areas and pore volumes of different electropun nanofibers.

|               | $S_{\text{BET}}$ ( $\text{m}^2 \text{g}^{-1}$ ) | $V_{\text{total}}$ ( $\text{cm}^3 \text{g}^{-1}$ ) | $V_{\text{meso}}$ ( $\text{cm}^3 \text{g}^{-1}$ ) |
|---------------|-------------------------------------------------|----------------------------------------------------|---------------------------------------------------|
| PAN-800       | 958                                             | 0.49                                               | 0.10                                              |
| Mn/PAN-800    | 39                                              | 0.12                                               | 0.10                                              |
| MnTA/PAN-800  | 133                                             | 0.12                                               | 0.06                                              |
| MnO@NMCNF-600 | 113                                             | 0.53                                               | 0.48                                              |
| MnO@NMCNF-700 | 105                                             | 0.53                                               | 0.49                                              |
| MnO@NMCNF     | 101                                             | 0.59                                               | 0.55                                              |
| MnO@NMCNF-900 | 178                                             | 0.87                                               | 0.80                                              |

**Table S2.**  $R_s$  and  $R_{ct}$  values of different fresh Mn(II)-based electrodes.

|               | $R_s$ | $R_{ct}$ |
|---------------|-------|----------|
| MnO@NMCNF-600 | 31.68 | 177.8    |
| MnO@NMCNF-700 | 37.01 | 145.2    |
| MnO@NMCNF     | 28.79 | 55.84    |
| Mn/PAN-800    | 27.68 | 471.8    |
| MnTA/PAN-800  | 26.5  | 413.7    |

**Table S3.** Element contents of different freestanding electrodes using elemental analysis or ICP-OES.

|              | Content from elemental analysis<br>(wt%) |     | Content from ICP<br>(wt%) |
|--------------|------------------------------------------|-----|---------------------------|
|              | C                                        | N   | Mn                        |
| PAN-800      | 91.2                                     | 5.2 | N/A                       |
| Mn/PAN-800   | 29.4                                     | 3.8 | 48.9                      |
| MnTA/PAN-800 | 33.6                                     | 4.7 | 41.4                      |
| MnO@NMCNF    | 27.3                                     | 7.6 | 38.5                      |

**Table S4.** Performance of existing Li-CO<sub>2</sub> cells working in pure CO<sub>2</sub>.

|                                    | Areal capacity<br>(mA h cm <sup>-2</sup> ) | Electrode capacity<br>(mA h g <sup>-1</sup> )<br>[a] | Cut-off voltage<br>(V) | Cycling performance (cut-off capacity, mA h cm <sup>-2</sup> /current, mA cm <sup>-2</sup> /cycle number) | Substrate           | Ref.             |
|------------------------------------|--------------------------------------------|------------------------------------------------------|------------------------|-----------------------------------------------------------------------------------------------------------|---------------------|------------------|
| <b>MnO@NMCNF</b>                   | <b>19.07</b>                               | <b>8668</b>                                          | <b>2.0</b>             | <b>1/0.08/52</b>                                                                                          | <b>freestanding</b> | <b>This work</b> |
| Graphene                           | 4.7                                        | 553                                                  | 2.2                    | 0.5/0.025/20                                                                                              | carbon paper        | [1]              |
| CNT                                | 2.68                                       | 316                                                  | 2.2                    | 0.5/0.025/29                                                                                              | carbon paper        | [2]              |
| B,N-codoped holey graphene         | 4.81                                       | 567                                                  | 2.0                    | 0.3/0.3/200                                                                                               | carbon paper        | [3]              |
| CQD/hG                             | 1.23                                       | 149                                                  | 2.0                    | 0.05/0.1/235                                                                                              | carbon paper        | [4]              |
| Ru/Ni foam                         | 1.36                                       | 40                                                   | 2.0                    | 0.15/0.03/100                                                                                             | Ni foam             | [5]              |
| Ru@Super P                         | 2.47                                       | 291                                                  | 2.0                    | 0.3/0.09/70                                                                                               | carbon paper        | [6]              |
| RuO <sub>2</sub> /CNT              | 0.87                                       | 102                                                  | 2.2                    | 0.2/0.02/55                                                                                               | carbon paper        | [7]              |
| RuO <sub>2</sub> /LDO              | 1.36                                       | 40                                                   | 2.5                    | 0.25/0.04/60                                                                                              | Ni foam             | [8]              |
| Ru-Cu NPs/G                        | 3.84                                       | 454                                                  | 2.3                    | 0.28/0.1/100                                                                                              | carbon paper        | [9]              |
| RuP <sub>2</sub> /NPCF             | 2.39                                       | 286                                                  | 2.0                    | 0.2/0.04/200                                                                                              | carbon paper        | [10]             |
| Ru/ACNFs                           | 4.6                                        | 11495                                                | 2.0                    | 0.4/0.04/50                                                                                               | <b>freestanding</b> | [11]             |
| Ru/CNT/Wood                        | 11                                         | 1.25                                                 | 2.0                    | 0.28/0.05/200                                                                                             | <b>freestanding</b> | [12]             |
| Ir/C NF                            | 11.54                                      | N/A                                                  | 2.0                    | 0.1/0.02/120                                                                                              | <b>freestanding</b> | [13]             |
| IrO <sub>2</sub> /MnO <sub>2</sub> | 2.64                                       | 184                                                  | 2.0                    | 1/0.4/378                                                                                                 | carbon cloth        | [14]             |

|                                  |      |      |     |               |                     |      |
|----------------------------------|------|------|-----|---------------|---------------------|------|
| Ir NSs-<br>CNFs                  | 2.3  | 272  | 2.0 | 0.3/0.15/400  | carbon paper        | [15] |
| NiFe@NC/<br>PPC                  | 6.8  | 518  | 2.0 | 0.25/0.05/109 | <b>freestanding</b> | [16] |
| P-Mn <sub>2</sub> O <sub>3</sub> | 7.55 | 841  | 2.0 | 0.8/0.04/50   | carbon paper        | [17] |
| Mo <sub>2</sub> C/CNT            | 0.75 | 73   | 2.0 | 0.06/0.01/40  | carbon paper        | [18] |
| Ni-NG                            | 5.64 | 664  | 2.2 | 0.32/0.03/101 | carbon paper        | [19] |
| Ni/rGO<br>framework              | 14.6 | 8991 | 2.0 | 1.62/0.16/100 | <b>freestanding</b> | [20] |
| Cu-NG                            | 4.76 | 560  | 2.2 | 0.32/0.12/50  | carbon paper        | [21] |
| ZnS<br>NST/N-<br>rGO             | 3.3  | 389  | 2.0 | 0.32/0.13/190 | carbon paper        | [22] |
| CoPPc                            | 13.6 | 909  | 2.0 | 1/0.05/50     | carbon cloth        | [23] |
| Mn-MOF                           | 5.77 | 679  | 2.0 | 0.32/0.06/50  | carbon paper        | [24] |
| MnO@NC-<br>rGO                   | 8    | 943  | 2.0 | 0.32/0.32/200 | carbon paper        | [25] |

---

[a] Electrode capacity is calculated based on the total mass of substrate and catalyst in the cathode side.

## References

- [1] Z. Zhang, Q. Zhang, Y. Chen, J. Bao, X. Zhou, Z. Xie, J. Wei and Z. Zhou, *Angew. Chem. Int. Ed.*, 2015, **54**, 6550-6553.
- [2] X. Zhang, Q. Zhang, Z. Zhang, Y. Chen, Z. Xie, J. Wei and Z. Zhou, *Chem. Commun.*, 2015, **51**, 14636-14639.
- [3] L. Qie, Y. Lin, J. W. Connell, J. Xu and L. Dai, *Angew. Chem. Int. Ed.*, 2017, **56**, 6970-6974.
- [4] Y. Jin, C. Hu, Q. Dai, Y. Xiao, Y. Lin, J. W. Connell, F. Chen and L. Dai, *Adv. Funct. Mater.*, 2018, **28**, 1804630.
- [5] H. Zhao, D. Li, H. Li, A. G. Tamirat, X. Song, Z. Zhang, Y. Wang, Z. Guo, L. Wang and S. Feng, *Electrochim. Acta*, 2019, **299**, 592-599.
- [6] S. Yang, Y. Qiao, P. He, Y. Liu, Z. Cheng, J.-j. Zhu and H. Zhou, *Energy Environ. Sci.*, 2017, **10**, 972-978.
- [7] S. Bie, M. Du, W. He, H. Zhang, Z. Yu, J. Liu, M. Liu, W. Yan, L. Zhou and Z. Zou, *ACS Appl. Mater. Interfaces*, 2019, **11**, 5146.
- [8] S.-M. Xu, Z.-C. Ren, X. Liu, X. Liang, K.-X. Wang and J.-S. Chen, *Energy Storage Mater.*, 2018, **15**, 291-298.
- [9] Z. Zhang, C. Yang, S. Wu, A. Wang, L. Zhao, D. Zhai, B. Ren, K. Cao and Z. Zhou, *Adv. Energy Mater.*, 2019, **9**, 1802805.
- [10] Z. Guo, J. Li, H. Qi, X. Sun, H. Li, A. G. Tamirat, J. Liu, Y. Wang and L. Wang, *Small*, 2019, **15**, 1803246.
- [11] Y. Qiao, S. Xu, Y. Liu, J. Dai, H. Xie, Y. Yao, X. Mu, C. Chen, D. J. Kline, E. M. Hitz, B. Liu, J. Song, P. He, M. R. Zachariah and L. Hu, *Energy Environ. Sci.*, 2019, **12**, 1100-1107.
- [12] S. Xu, C. Chen, Y. Kuang, J. Song, W. Gan, B. Liu, E. M. Hitz, J. W. Connell, Y. Lin and L. Hu, *Energy Environ. Sci.*, 2018, **11**, 3231-3237.
- [13] C. Wang, Q. Zhang, X. Zhang, X. G. Wang, Z. Xie and Z. Zhou, *Small*, 2018, **14**, 1800641..
- [14] Y. Mao, C. Tang, Z. Tang, J. Xie, Z. Chen, J. Tu, G. Cao and X. Zhao, *Energy Storage Mater.*, 2019, **18**, 405-413.
- [15] Y. Xing, Y. Yang, D. Li, M. Luo, N. Chen, Y. Ye, J. Qian, L. Li, D. Yang, F. Wu, R. Chen and S. Guo, *Adv. Mater.*, 2018, **30**, 1803124.
- [16] H. Liang, Y. Zhang, F. Chen, S. Jing, S. Yin and P. Tsiakaras, *Appl. Catal. B Environ.*, 2019, **244**, 559-567.
- [17] W. Ma, S. Lu, X. Lei, X. Liu and Y. Ding, *J. Mater. Chem. A*, 2018, **6**, 20829-20835.
- [18] Y. Hou, J. Wang, L. Liu, Y. Liu, S. Chou, D. Shi, H. Liu, Y. Wu, W. Zhang and J. Chen, *Adv. Funct. Mater.*, 2017, **27**, 1700564.
- [19] Z. Zhang, X. G. Wang, X. Zhang, Z. Xie, Y. N. Chen, L. Ma, Z. Peng and Z. Zhou, *Adv. Sci.*, 2018, **5**, 1700567.
- [20] Y. Qiao, Y. Liu, C. Chen, H. Xie, Y. Yao, S. He, W. Ping, B. Liu and L. Hu, *Adv. Funct. Mater.*, 2018, **28**, 1805899.
- [21] Z. Zhang, Z. W. Zhang, P. F. Liu, Y. P. Xie, K. Z. Cao and Z. Zhou, *J. Mater. Chem. A*, 2018, **6**, 3218-3223.
- [22] H. Wang, K. Xie, Y. You, Q. Hou, K. Zhang, N. Li, W. Yu, K. P. Loh, C. Shen and B. Wei, *Adv. Energy Mater.*, 2019, **9**, 1901806.
- [23] J. Chen, K. Zou, P. Ding, J. Deng, C. Zha, Y. Hu, X. Zhao, J. Wu, J. Fan and Y. Li, *Adv. Mater.*, 2019, **31**, 1805484.
- [24] S. Li, Y. Dong, J. Zhou, Y. Liu, J. Wang, X. Gao, Y. Han, P. Qi and B. Wang, *Energy Environ. Sci.*, 2018, **11**, 1318-1325.

- [25] S. Li, Y. Liu, J. Zhou, S. Hong, Y. Dong, J. Wang, X. Gao, P. Qi, Y. Han and B. Wang, *Energy Environ. Sci.*, 2019, **12**, 1046-1054.
